# Supplementary material for: Building multi-component crystals from cations and co-crystals: the use of chaperones
Source: Royal Society of Chemistry journal article supplement (doi:10.1039/c2ce26498f), 2012-11-13
Supplement: c2ce26498f.pdf [file c2ce26498f.pdf]

# Neutral Dimer System

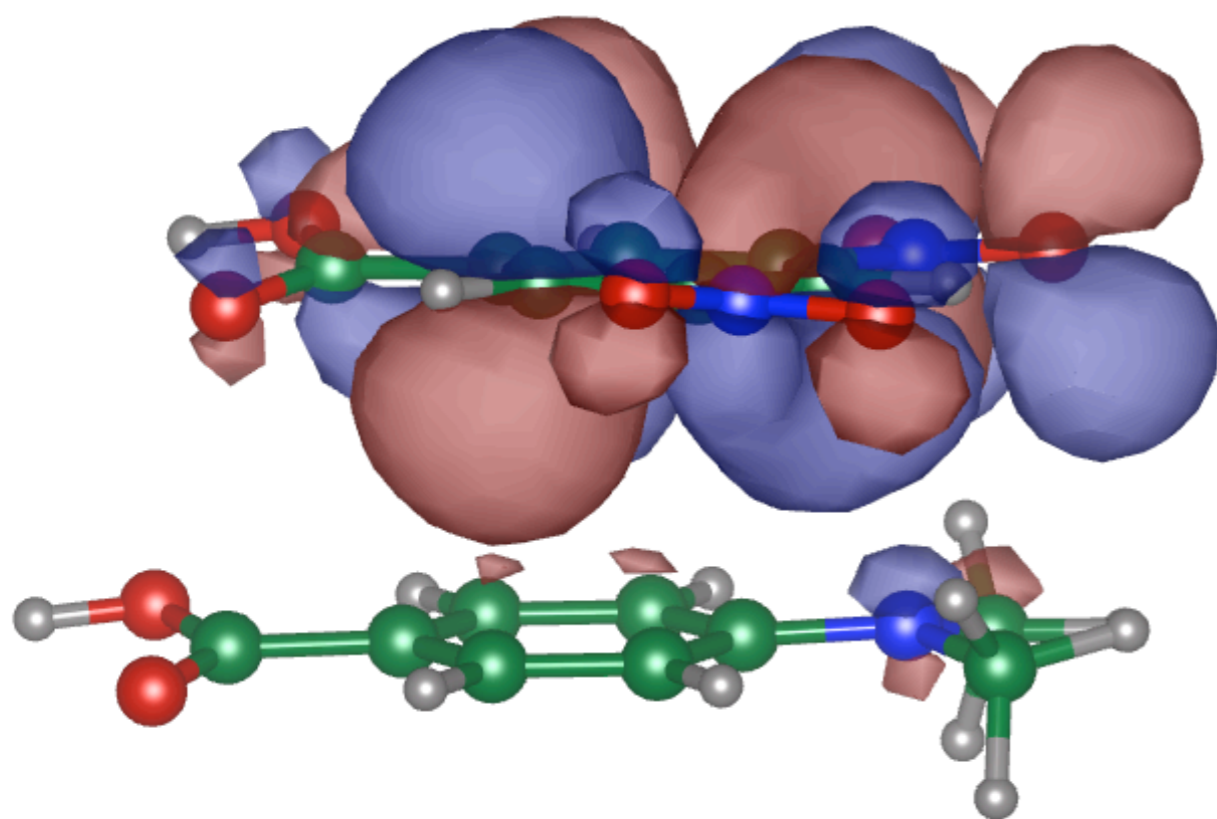

LUMO of 3,5-dnba/  
4-dmaba dimer  
 $E = -1.9118 \text{ eV}$

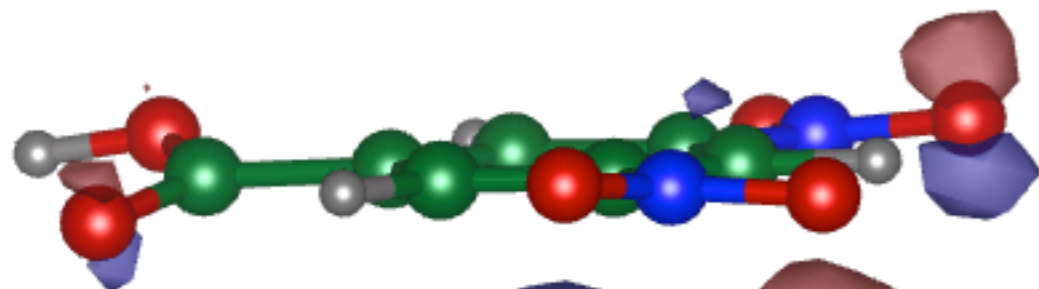

HOMO of 3,5-dnba/  
4-dmaba dimer  
 $E = -7.056 \text{ eV}$

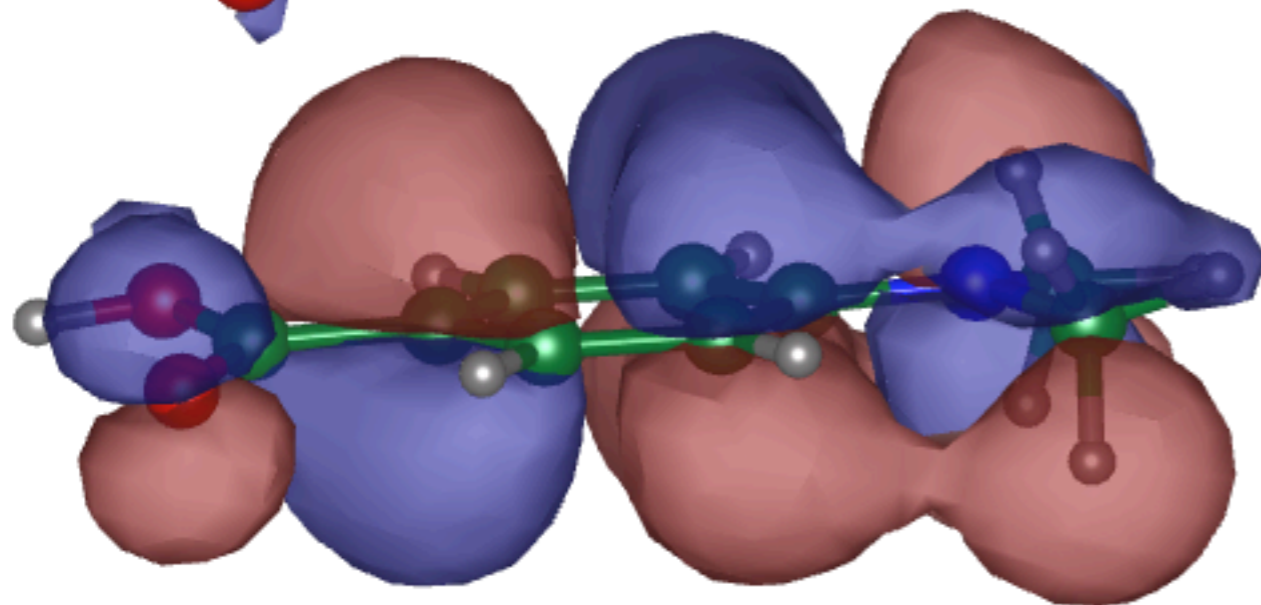

# 1<sup>-</sup> Dimer System

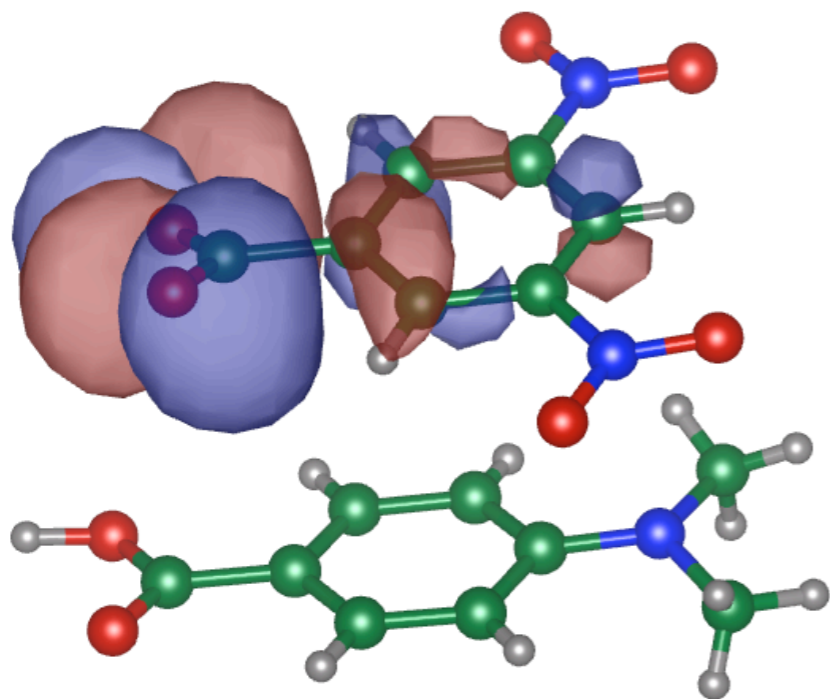

LUMO of 3,5-dnba-/4-dmaba dimer  
E = 1.1755 eV

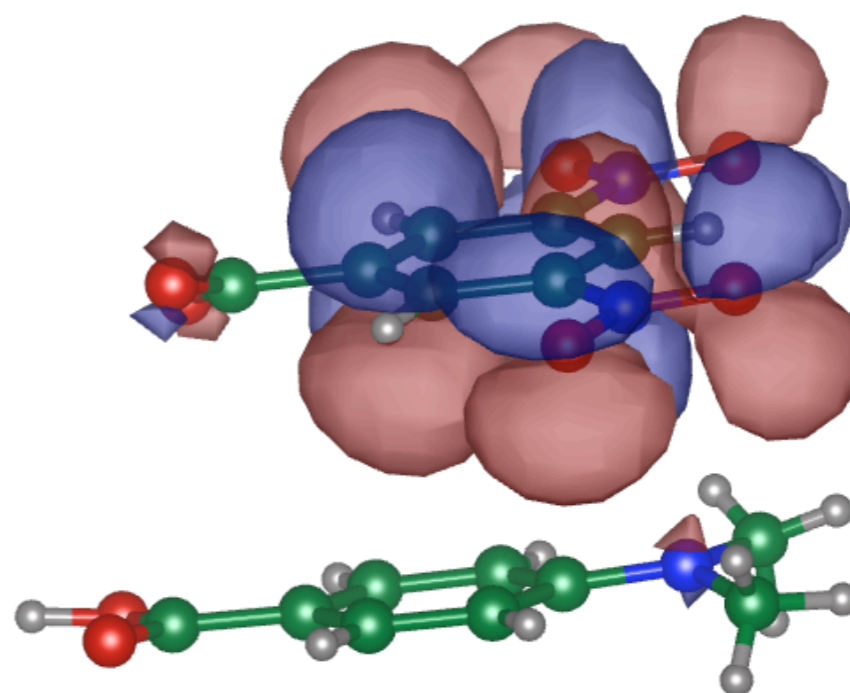

HOMO of 3,5-dnba-/4-dmaba dimer  
E = -3.9981 eV

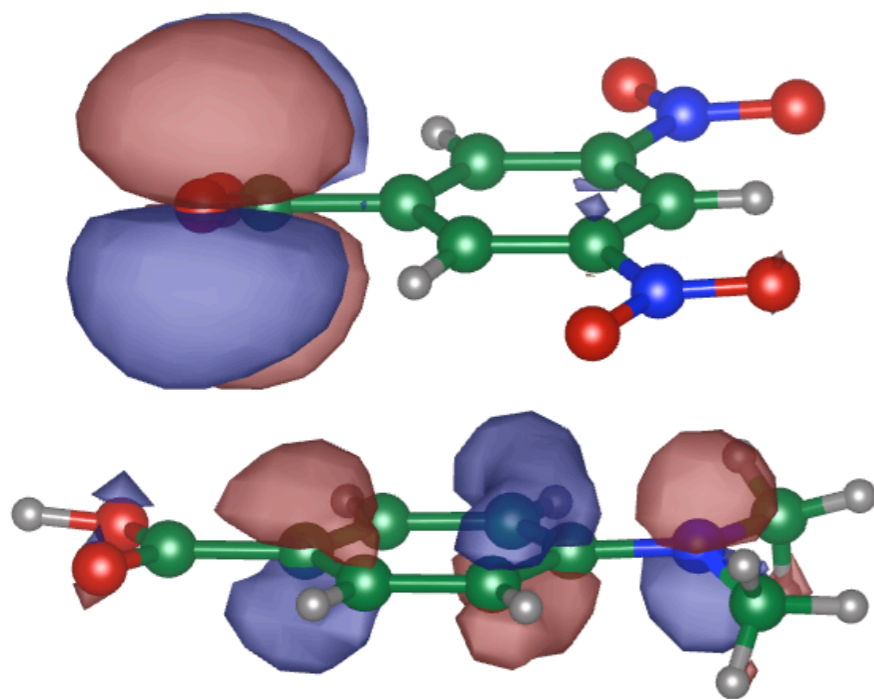

2<sup>nd</sup> HOMO of 3,5-dnba-/4-dmaba dimer  
E = -4.0582 eV

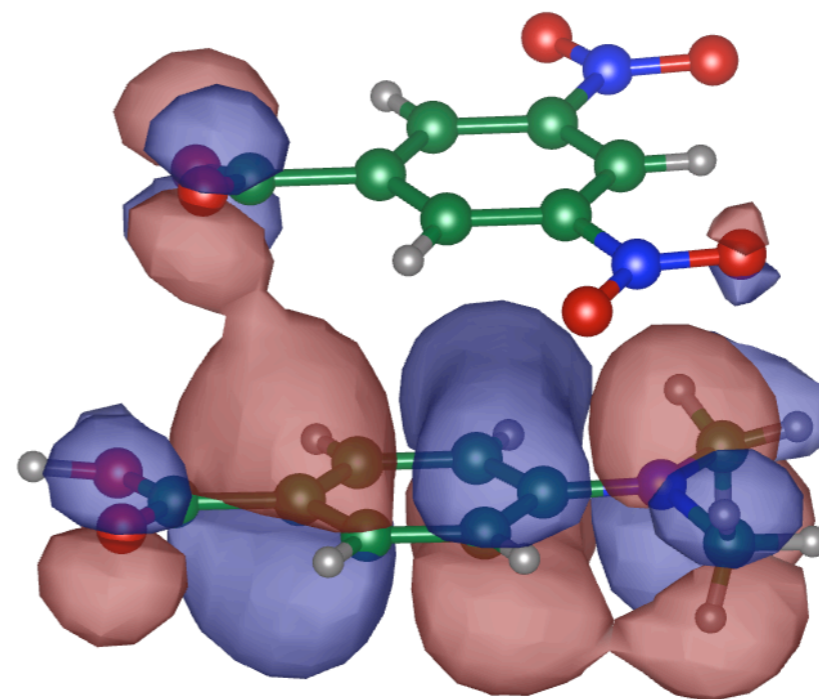

3<sup>rd</sup> HOMO of 3,5-dnba-/4-dmaba dimer  
E = -4.1625 eV

# 2<sup>-</sup> Dimer System

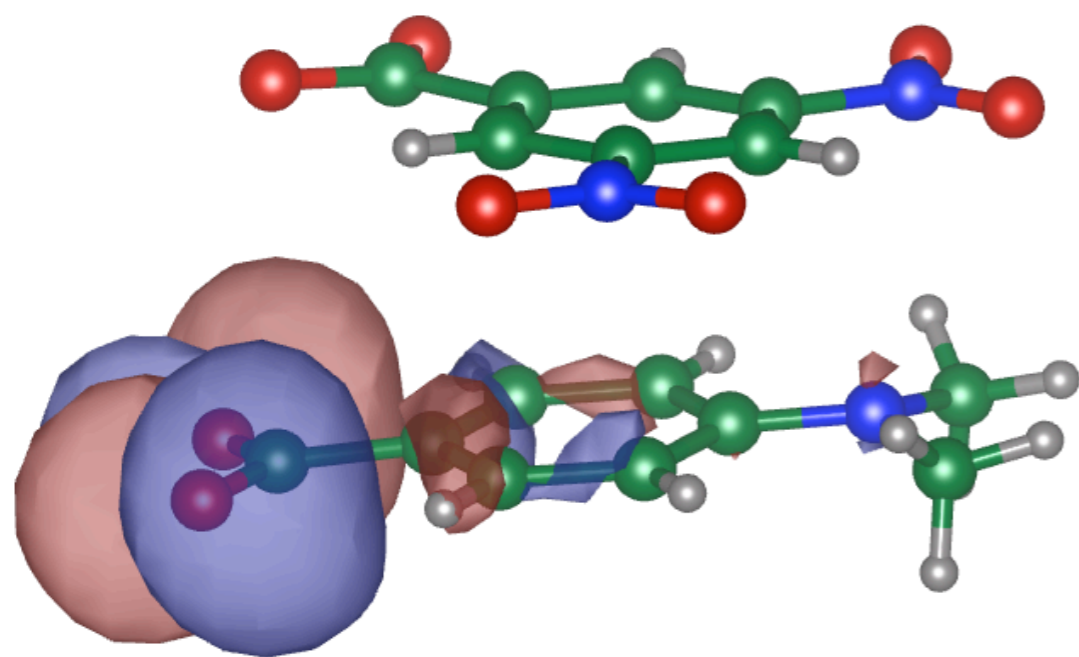

LUMO of 3,5-dnba<sup>-</sup>/4-dmaba<sup>-</sup> dimer  
E = 3.5366 eV

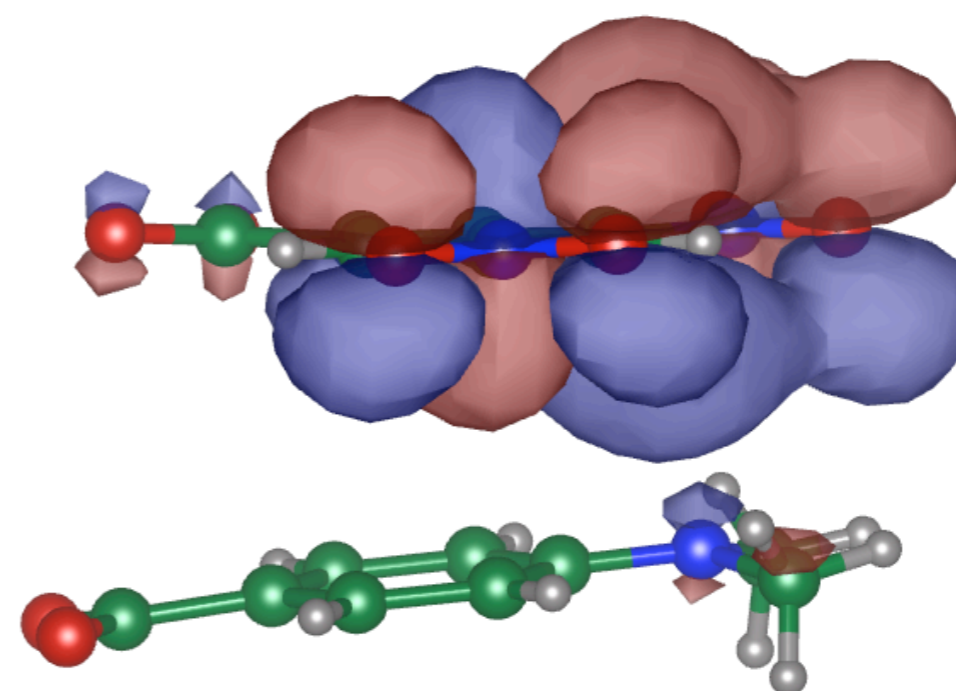

HOMO of 3,5-dnba<sup>-</sup>/4-dmaba<sup>-</sup> dimer  
E = -0.1239 eV

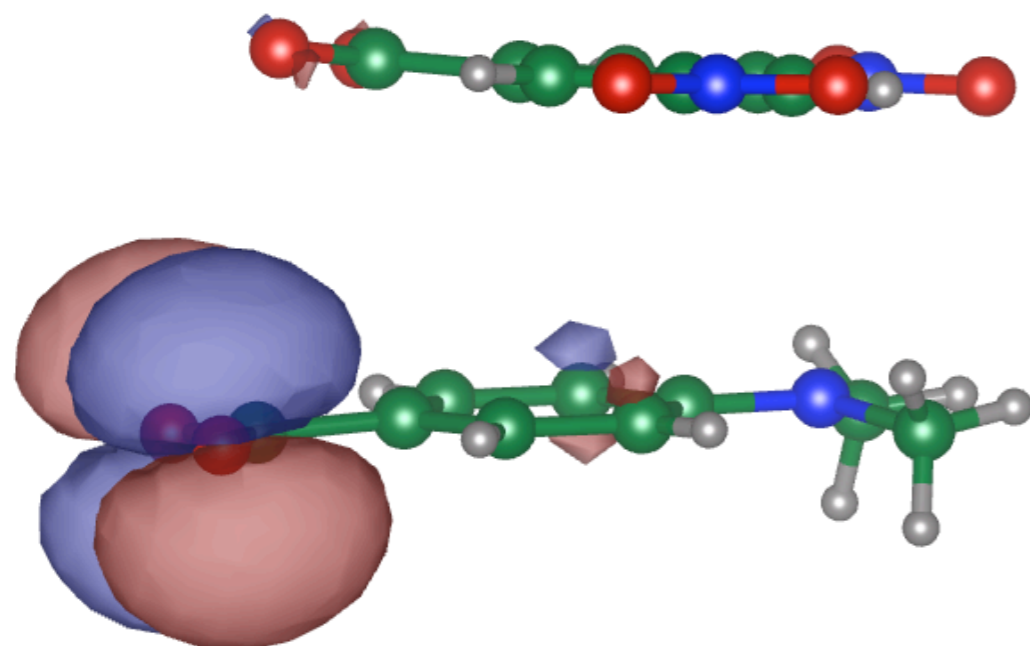

2<sup>nd</sup> HOMO of 3,5-dnba<sup>-</sup>/4-dmaba<sup>-</sup> dimer  
E = -0.246 eV

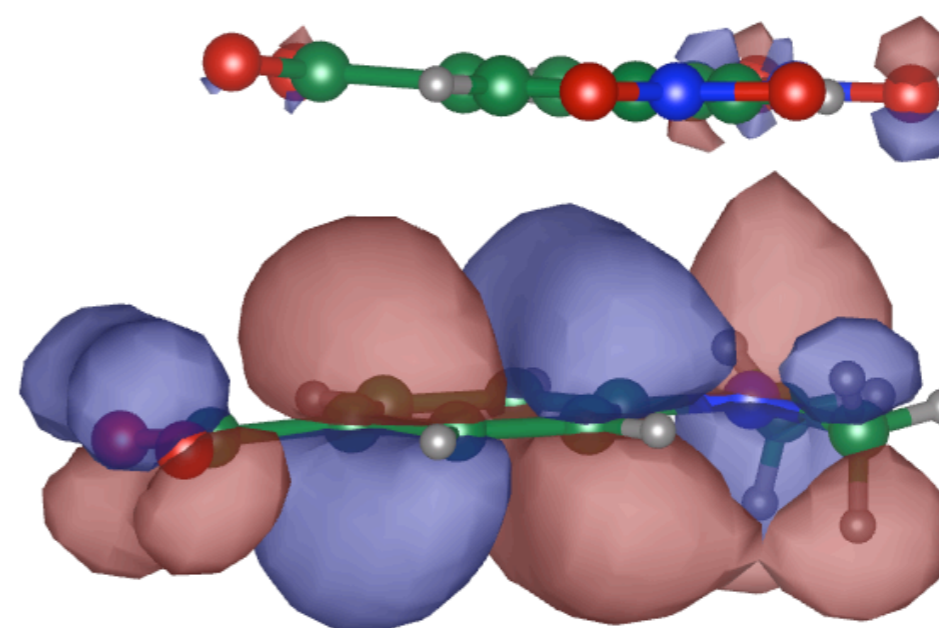

3<sup>rd</sup> HOMO of 3,5-dnba<sup>-</sup>/4-dmaba<sup>-</sup> dimer  
E = -0.6176 eV
